# Supplementary material
Source: publisher figshare collection journal article supplement (https://karger.figshare.com/ndownloader/files/30742396)
Supplement: Supplementary file 1 [file 30742396]

**Video. 1. Hyperkinetic movements triggered by standing up quickly**.

Manifestations of these attacks included choreic movements and dystonic posture of upper limbs, head, neck, and upper part of the trunk. The duration of the attacks was about 20 seconds.
